# Supplementary material for: Pt–Cu nanoalloy catalysts: compositional dependence and selectivity for direct electrochemical oxidation of formic acid
Source: Royal Society of Chemistry journal article supplement (doi:10.1039/d2nj01871c), 2022-01-01
Supplement: d2nj01871c1.pdf [file d2nj01871c1.pdf]

## Supporting information

### Pt-Cu Nanoalloy Catalysts: Compositional Dependence and Selectivity for Direct Electrochemical Oxidation of Formic Acid

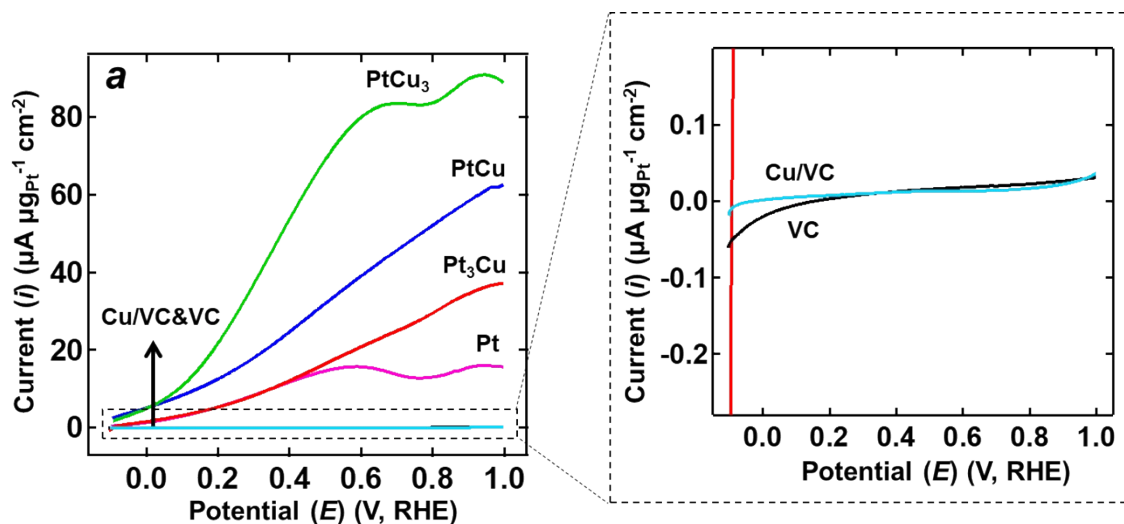

Figure S1. Catalytic direct formic acid (1 M) oxidation performance (mass activity) of Vulcan carbon (VC), Cu, commercial Pt, nanoalloy catalysts of Pt<sub>3</sub>Cu, PtCu and PtCu<sub>3</sub>.

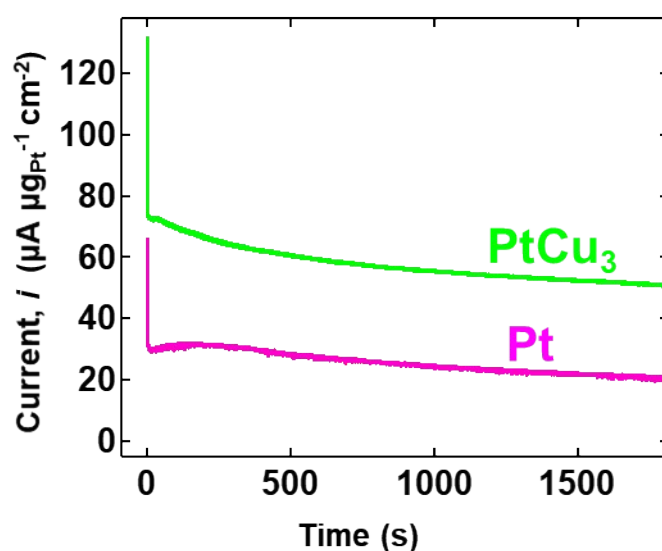

Figure S2. CA results of commercial Pt and PtCu<sub>3</sub> alloy catalysts
